# Supplementary material for: In Vitro and In Vivo Activity of AMG 337, a Potent and Selective MET Kinase Inhibitor, in MET-Dependent Cancer Models
Source: Oxford University Press journal article supplement (doi:10.1158/1535-7163.mct-15-0871), 2016-04-20
Supplement: 15357163mct150871-sup-157356_1_supp_3409807_k48tl8.xlsx [file 15357163mct150871-sup-157356_1_supp_3409807_k48tl8.xlsx]

## Sheet: Sheet1
Gene Symbol	Compound	% of Control at 1 µM
AAK1	AMG 337	100
ABL1	AMG 337	100
ABL1(E255K)	AMG 337	100
ABL1(F317I)	AMG 337	100
ABL1(F317L)	AMG 337	100
ABL1(H396P)	AMG 337	100
ABL1(M351T)	AMG 337	100
ABL1(Q252H)	AMG 337	100
ABL1(T315I)	AMG 337	100
ABL1(Y253F)	AMG 337	100
ABL2	AMG 337	100
ACVR1	AMG 337	100
ACVR1B	AMG 337	99
ACVR2A	AMG 337	100
ACVR2B	AMG 337	100
ACVRL1	AMG 337	100
ADCK3	AMG 337	100
ADCK4	AMG 337	98
AKT1	AMG 337	100
AKT2	AMG 337	78
AKT3	AMG 337	100
ALK	AMG 337	77
AMPK-alpha1	AMG 337	100
AMPK-alpha2	AMG 337	100
ANKK1	AMG 337	100
ARK5	AMG 337	100
ASK1	AMG 337	93
ASK2	AMG 337	100
AURKA	AMG 337	100
AURKB	AMG 337	100
AURKC	AMG 337	92
AXL	AMG 337	60
BIKE	AMG 337	86
BLK	AMG 337	100
BMPR1A	AMG 337	81
BMPR1B	AMG 337	100
BMPR2	AMG 337	100
BMX	AMG 337	100
BRAF	AMG 337	100
BRAF(V600E)	AMG 337	96
BRK	AMG 337	100
BRSK1	AMG 337	95
BRSK2	AMG 337	100
BTK	AMG 337	100
CAMK1	AMG 337	100
CAMK1D	AMG 337	100
CAMK1G	AMG 337	100
CAMK2A	AMG 337	100
CAMK2B	AMG 337	100
CAMK2D	AMG 337	100
CAMK2G	AMG 337	100
CAMK4	AMG 337	100
CAMKK1	AMG 337	100
CAMKK2	AMG 337	100
CDC2L1	AMG 337	100
CDC2L2	AMG 337	100
CDK11	AMG 337	100
CDK2	AMG 337	79
CDK3	AMG 337	100
CDK5	AMG 337	100
CDK7	AMG 337	100
CDK8	AMG 337	86
CDK9	AMG 337	100
CDKL2	AMG 337	94
CDKL3	AMG 337	100
CDKL5	AMG 337	91
CHEK1	AMG 337	92
CHEK2	AMG 337	100
CIT	AMG 337	92
CLK1	AMG 337	100
CLK2	AMG 337	100
CLK3	AMG 337	100
CLK4	AMG 337	100
CSF1R	AMG 337	72
CSK	AMG 337	100
CSNK1A1L	AMG 337	100
CSNK1D	AMG 337	72
CSNK1E	AMG 337	100
CSNK1G1	AMG 337	100
CSNK1G2	AMG 337	69
CSNK1G3	AMG 337	100
CSNK2A1	AMG 337	93
CSNK2A2	AMG 337	100
CTK	AMG 337	100
DAPK1	AMG 337	100
DAPK2	AMG 337	100
DAPK3	AMG 337	100
DCAMKL1	AMG 337	96
DCAMKL2	AMG 337	100
DCAMKL3	AMG 337	100
DDR1	AMG 337	82
DDR2	AMG 337	100
DLK	AMG 337	84
DMPK	AMG 337	98
DMPK2	AMG 337	100
DRAK1	AMG 337	93
DRAK2	AMG 337	92
DYRK1A	AMG 337	100
DYRK1B	AMG 337	100
DYRK2	AMG 337	100
EGFR	AMG 337	100
EGFR(E746-A750del)	AMG 337	87
EGFR(G719C)	AMG 337	100
EGFR(G719S)	AMG 337	100
EGFR(L747-E749del,A750P)	AMG 337	93
EGFR(L747-S752del,P753S)	AMG 337	95
EGFR(L747-T751del,Sins)	AMG 337	100
EGFR(L858R)	AMG 337	100
EGFR(L858R,T790M)	AMG 337	98
EGFR(L861Q)	AMG 337	84
EGFR(S752-I759del)	AMG 337	100
EPHA1	AMG 337	100
EPHA2	AMG 337	100
EPHA3	AMG 337	94
EPHA4	AMG 337	100
EPHA5	AMG 337	100
EPHA6	AMG 337	100
EPHA7	AMG 337	100
EPHA8	AMG 337	100
EPHB1	AMG 337	100
EPHB2	AMG 337	89
EPHB3	AMG 337	100
EPHB4	AMG 337	100
EPHB6	AMG 337	98
ERBB2	AMG 337	100
ERBB3	AMG 337	63
ERBB4	AMG 337	100
ERK1	AMG 337	94
ERK2	AMG 337	100
ERK3	AMG 337	97
ERK4	AMG 337	93
ERK5	AMG 337	100
ERK8	AMG 337	100
ERN1	AMG 337	100
FAK	AMG 337	78
FER	AMG 337	100
FES	AMG 337	100
FGFR1	AMG 337	100
FGFR2	AMG 337	100
FGFR3	AMG 337	98
FGFR3(G697C)	AMG 337	100
FGFR4	AMG 337	100
FGR	AMG 337	100
FLT1	AMG 337	100
FLT3	AMG 337	90
FLT3(D835H)	AMG 337	100
FLT3(D835Y)	AMG 337	81
FLT3(ITD)	AMG 337	100
FLT3(K663Q)	AMG 337	95
FLT3(N841I)	AMG 337	97
FLT4	AMG 337	88
FRK	AMG 337	100
FYN	AMG 337	100
GAK	AMG 337	100
GCN2(Kin.Dom.2,S808G)	AMG 337	100
GRK1	AMG 337	100
GRK4	AMG 337	100
GRK7	AMG 337	99
GSK3A	AMG 337	100
GSK3B	AMG 337	100
HCK	AMG 337	100
HIPK1	AMG 337	100
HIPK2	AMG 337	100
HIPK3	AMG 337	100
HIPK4	AMG 337	88
HPK1	AMG 337	83
HUNK	AMG 337	100
ICK	AMG 337	100
IGF1R	AMG 337	91
IKK-alpha	AMG 337	86
IKK-beta	AMG 337	100
IKK-epsilon	AMG 337	97
INSR	AMG 337	78
INSRR	AMG 337	100
IRAK1	AMG 337	100
IRAK3	AMG 337	98
ITK	AMG 337	100
JAK1(JH1domain-catalytic)	AMG 337	100
JAK1(JH2domain-pseudokinase)	AMG 337	96
JAK2(JH1domain-catalytic)	AMG 337	100
JAK3(JH1domain-catalytic)	AMG 337	100
JNK1	AMG 337	78
JNK2	AMG 337	100
JNK3	AMG 337	100
KIT	AMG 337	100
KIT(D816V)	AMG 337	98
KIT(L576P)	AMG 337	100
KIT(V559D)	AMG 337	100
KIT(V559D,T670I)	AMG 337	100
KIT(V559D,V654A)	AMG 337	100
LATS1	AMG 337	91
LATS2	AMG 337	99
LCK	AMG 337	100
LIMK1	AMG 337	100
LIMK2	AMG 337	99
LKB1	AMG 337	99
LOK	AMG 337	100
LTK	AMG 337	85
LYN	AMG 337	100
LZK	AMG 337	100
MAK	AMG 337	88
MAP3K1	AMG 337	100
MAP3K15	AMG 337	100
MAP3K2	AMG 337	100
MAP3K3	AMG 337	100
MAP3K4	AMG 337	94
MAP4K2	AMG 337	98
MAP4K3	AMG 337	100
MAP4K4	AMG 337	100
MAP4K5	AMG 337	93
MAPKAPK2	AMG 337	100
MAPKAPK5	AMG 337	100
MARK1	AMG 337	100
MARK2	AMG 337	100
MARK3	AMG 337	72
MARK4	AMG 337	100
MAST1	AMG 337	100
MEK1	AMG 337	100
MEK2	AMG 337	100
MEK3	AMG 337	100
MEK4	AMG 337	86
MEK6	AMG 337	100
MELK	AMG 337	90
MERTK	AMG 337	100
MET	AMG 337	3.1
MET(M1250T)	AMG 337	5.4
MET(Y1235D)	AMG 337	0.3
MINK	AMG 337	98
MKNK1	AMG 337	100
MKNK2	AMG 337	79
MLCK	AMG 337	96
MLK1	AMG 337	85
MLK2	AMG 337	100
MLK3	AMG 337	100
MRCKA	AMG 337	100
MRCKB	AMG 337	100
MST1	AMG 337	80
MST1R	AMG 337	92
MST2	AMG 337	95
MST3	AMG 337	100
MST4	AMG 337	100
MUSK	AMG 337	100
MYLK	AMG 337	94
MYLK2	AMG 337	100
MYO3A	AMG 337	100
MYO3B	AMG 337	81
NDR1	AMG 337	100
NDR2	AMG 337	100
NEK1	AMG 337	100
NEK2	AMG 337	100
NEK5	AMG 337	100
NEK6	AMG 337	100
NEK7	AMG 337	100
NEK9	AMG 337	100
NIM1	AMG 337	100
NLK	AMG 337	100
OSR1	AMG 337	100
p38-alpha	AMG 337	100
p38-beta	AMG 337	100
p38-delta	AMG 337	88
p38-gamma	AMG 337	100
PAK1	AMG 337	100
PAK2	AMG 337	96
PAK3	AMG 337	80
PAK4	AMG 337	99
PAK6	AMG 337	100
PAK7	AMG 337	97
PCTK1	AMG 337	100
PCTK2	AMG 337	99
PCTK3	AMG 337	100
PDGFRA	AMG 337	81
PDGFRB	AMG 337	100
PDPK1	AMG 337	97
PFTAIRE2	AMG 337	100
PFTK1	AMG 337	100
PHKG1	AMG 337	100
PHKG2	AMG 337	100
PIK3C2B	AMG 337	100
PIK3C2G	AMG 337	99
PIK3CA	AMG 337	100
PIK3CA(C420R)	AMG 337	100
PIK3CA(E542K)	AMG 337	100
PIK3CA(E545A)	AMG 337	100
PIK3CA(E545K)	AMG 337	100
PIK3CA(H1047L)	AMG 337	100
PIK3CA(H1047Y)	AMG 337	100
PIK3CA(M1043I)	AMG 337	100
PIK3CA(Q546K)	AMG 337	100
PIK3CB	AMG 337	100
PIK3CD	AMG 337	100
PIK3CG	AMG 337	100
PIK4CB	AMG 337	100
PIM1	AMG 337	98
PIM2	AMG 337	97
PIM3	AMG 337	100
PIP5K1A	AMG 337	100
PIP5K2B	AMG 337	100
PKAC-alpha	AMG 337	97
PKAC-beta	AMG 337	100
PKMYT1	AMG 337	96
PKN1	AMG 337	100
PKN2	AMG 337	100
PLK1	AMG 337	100
PLK2	AMG 337	94
PLK3	AMG 337	94
PLK4	AMG 337	100
PRKCD	AMG 337	100
PRKCE	AMG 337	100
PRKCH	AMG 337	100
PRKCQ	AMG 337	100
PRKD1	AMG 337	100
PRKD2	AMG 337	100
PRKD3	AMG 337	84
PRKG1	AMG 337	98
PRKG2	AMG 337	100
PRKR	AMG 337	100
PRKX	AMG 337	80
PRP4	AMG 337	93
PYK2	AMG 337	100
QSK	AMG 337	100
RAF1	AMG 337	100
RET	AMG 337	88
RET(M918T)	AMG 337	100
RET(V804L)	AMG 337	100
RET(V804M)	AMG 337	86
RIOK1	AMG 337	100
RIOK2	AMG 337	100
RIOK3	AMG 337	79
RIPK1	AMG 337	100
RIPK2	AMG 337	100
RIPK4	AMG 337	100
ROCK1	AMG 337	95
ROCK2	AMG 337	100
ROS1	AMG 337	100
RPS6KA1(Kin.Dom.1-N-terminal)	AMG 337	100
RPS6KA1(Kin.Dom.2-C-terminal)	AMG 337	100
RPS6KA2(Kin.Dom.1-N-terminal)	AMG 337	100
RPS6KA2(Kin.Dom.2-C-terminal)	AMG 337	97
RPS6KA3(Kin.Dom.1-N-terminal)	AMG 337	76
RPS6KA4(Kin.Dom.1-N-terminal)	AMG 337	100
RPS6KA4(Kin.Dom.2-C-terminal)	AMG 337	100
RPS6KA5(Kin.Dom.1-N-terminal)	AMG 337	99
RPS6KA5(Kin.Dom.2-C-terminal)	AMG 337	100
RPS6KA6(Kin.Dom.1-N-terminal)	AMG 337	95
RPS6KA6(Kin.Dom.2-C-terminal)	AMG 337	100
SBK1	AMG 337	100
SgK085	AMG 337	100
SgK110	AMG 337	89
SIK	AMG 337	100
SIK2	AMG 337	100
SLK	AMG 337	100
SNARK	AMG 337	100
SRC	AMG 337	94
SRMS	AMG 337	68
SRPK1	AMG 337	75
SRPK2	AMG 337	100
SRPK3	AMG 337	100
STK16	AMG 337	100
STK33	AMG 337	100
STK35	AMG 337	100
STK36	AMG 337	100
STK39	AMG 337	100
SYK	AMG 337	100
TAK1	AMG 337	100
TAO1	AMG 337	100
TAOK1	AMG 337	100
TAOK3	AMG 337	100
TBK1	AMG 337	100
TEC	AMG 337	100
TESK1	AMG 337	100
TGFBR1	AMG 337	99
TGFBR2	AMG 337	100
TIE1	AMG 337	100
TIE2	AMG 337	100
TLK1	AMG 337	100
TLK2	AMG 337	100
TNIK	AMG 337	100
TNK1	AMG 337	100
TNK2	AMG 337	100
TNNI3K	AMG 337	100
TRKA	AMG 337	78
TRKB	AMG 337	96
TRKC	AMG 337	100
TSSK1B	AMG 337	50
TTK	AMG 337	100
TXK	AMG 337	98
TYK2(JH1domain-catalytic)	AMG 337	100
TYK2(JH2domain-pseudokinase)	AMG 337	95
TYRO3	AMG 337	100
ULK1	AMG 337	100
ULK2	AMG 337	100
ULK3	AMG 337	100
VEGFR2	AMG 337	84
WEE1	AMG 337	100
WEE2	AMG 337	100
YANK2	AMG 337	100
YANK3	AMG 337	73
YES	AMG 337	100
YSK1	AMG 337	100
YSK4	AMG 337	90
ZAK	AMG 337	100
ZAP70	AMG 337	100
AAK1	Compound 5	100
ABL1	Compound 5	76
ABL1(E255K)	Compound 5	100
ABL1(F317I)	Compound 5	100
ABL1(F317L)	Compound 5	100
ABL1(H396P)	Compound 5	100
ABL1(M351T)	Compound 5	100
ABL1(Q252H)	Compound 5	98
ABL1(T315I)	Compound 5	82
ABL1(Y253F)	Compound 5	91
ABL2	Compound 5	100
ACVR1	Compound 5	87
ACVR1B	Compound 5	100
ACVR2A	Compound 5	100
ACVR2B	Compound 5	100
ACVRL1	Compound 5	100
ADCK3	Compound 5	92
ADCK4	Compound 5	100
AKT1	Compound 5	100
AKT2	Compound 5	100
AKT3	Compound 5	100
ALK	Compound 5	100
AMPK-alpha1	Compound 5	100
AMPK-alpha2	Compound 5	100
ANKK1	Compound 5	98
ARK5	Compound 5	100
ASK1	Compound 5	82
ASK2	Compound 5	100
AURKA	Compound 5	100
AURKB	Compound 5	89
AURKC	Compound 5	100
AXL	Compound 5	100
BIKE	Compound 5	100
BLK	Compound 5	88
BMPR1A	Compound 5	92
BMPR1B	Compound 5	100
BMPR2	Compound 5	100
BMX	Compound 5	100
BRAF	Compound 5	91
BRAF(V600E)	Compound 5	77
BRK	Compound 5	100
BRSK1	Compound 5	90
BRSK2	Compound 5	94
BTK	Compound 5	100
CAMK1	Compound 5	100
CAMK1D	Compound 5	98
CAMK1G	Compound 5	99
CAMK2A	Compound 5	100
CAMK2B	Compound 5	100
CAMK2D	Compound 5	100
CAMK2G	Compound 5	94
CAMK4	Compound 5	94
CAMKK1	Compound 5	97
CAMKK2	Compound 5	79
CDC2L1	Compound 5	99
CDC2L2	Compound 5	92
CDK11	Compound 5	100
CDK2	Compound 5	100
CDK3	Compound 5	100
CDK5	Compound 5	80
CDK7	Compound 5	94
CDK8	Compound 5	94
CDK9	Compound 5	100
CDKL2	Compound 5	95
CDKL3	Compound 5	100
CDKL5	Compound 5	84
CHEK1	Compound 5	100
CHEK2	Compound 5	100
CIT	Compound 5	91
CLK1	Compound 5	100
CLK2	Compound 5	100
CLK3	Compound 5	100
CLK4	Compound 5	92
CSF1R	Compound 5	98
CSK	Compound 5	100
CSNK1A1L	Compound 5	96
CSNK1D	Compound 5	98
CSNK1E	Compound 5	100
CSNK1G1	Compound 5	80
CSNK1G2	Compound 5	91
CSNK1G3	Compound 5	100
CSNK2A1	Compound 5	100
CSNK2A2	Compound 5	100
CTK	Compound 5	100
DAPK1	Compound 5	88
DAPK2	Compound 5	100
DAPK3	Compound 5	100
DCAMKL1	Compound 5	100
DCAMKL2	Compound 5	100
DCAMKL3	Compound 5	100
DDR1	Compound 5	100
DDR2	Compound 5	100
DLK	Compound 5	62
DMPK	Compound 5	100
DMPK2	Compound 5	95
DRAK1	Compound 5	87
DRAK2	Compound 5	93
DYRK1A	Compound 5	82
DYRK1B	Compound 5	100
DYRK2	Compound 5	100
EGFR	Compound 5	100
EGFR(E746-A750del)	Compound 5	98
EGFR(G719C)	Compound 5	87
EGFR(G719S)	Compound 5	88
EGFR(L747-E749del, A750P)	Compound 5	100
EGFR(L747-S752del, P753S)	Compound 5	79
EGFR(L747-T751del,Sins)	Compound 5	85
EGFR(L858R)	Compound 5	100
EGFR(L858R,T790M)	Compound 5	98
EGFR(L861Q)	Compound 5	100
EGFR(S752-I759del)	Compound 5	92
EPHA1	Compound 5	100
EPHA2	Compound 5	80
EPHA3	Compound 5	100
EPHA4	Compound 5	100
EPHA5	Compound 5	89
EPHA6	Compound 5	100
EPHA7	Compound 5	100
EPHA8	Compound 5	100
EPHB1	Compound 5	100
EPHB2	Compound 5	100
EPHB3	Compound 5	100
EPHB4	Compound 5	100
EPHB6	Compound 5	100
ERBB2	Compound 5	99
ERBB3	Compound 5	97
ERBB4	Compound 5	100
ERK1	Compound 5	100
ERK2	Compound 5	86
ERK3	Compound 5	76
ERK4	Compound 5	94
ERK5	Compound 5	97
ERK8	Compound 5	100
ERN1	Compound 5	100
FAK	Compound 5	97
FER	Compound 5	100
FES	Compound 5	100
FGFR1	Compound 5	87
FGFR2	Compound 5	86
FGFR3	Compound 5	91
FGFR3(G697C)	Compound 5	100
FGFR4	Compound 5	98
FGR	Compound 5	100
FLT1	Compound 5	100
FLT3	Compound 5	100
FLT3(D835H)	Compound 5	99
FLT3(D835Y)	Compound 5	95
FLT3(ITD)	Compound 5	100
FLT3(K663Q)	Compound 5	100
FLT3(N841I)	Compound 5	100
FLT4	Compound 5	100
FRK	Compound 5	99
FYN	Compound 5	100
GAK	Compound 5	81
GCN2(Kin.Dom.2,S808G)	Compound 5	100
GRK1	Compound 5	100
GRK4	Compound 5	100
GRK7	Compound 5	94
GSK3A	Compound 5	90
GSK3B	Compound 5	90
HCK	Compound 5	100
HIPK1	Compound 5	85
HIPK2	Compound 5	100
HIPK3	Compound 5	100
HIPK4	Compound 5	100
HPK1	Compound 5	94
HUNK	Compound 5	100
ICK	Compound 5	78
IGF1R	Compound 5	100
IKK-alpha	Compound 5	74
IKK-beta	Compound 5	100
IKK-epsilon	Compound 5	81
INSR	Compound 5	97
INSRR	Compound 5	100
IRAK1	Compound 5	85
IRAK3	Compound 5	94
ITK	Compound 5	98
JAK1(JH1domain-catalytic)	Compound 5	100
JAK1(JH2domain-pseudokinase)	Compound 5	91
JAK2(JH1domain-catalytic)	Compound 5	84
JAK3(JH1domain-catalytic)	Compound 5	69
JNK1	Compound 5	100
JNK2	Compound 5	88
JNK3	Compound 5	92
KIT	Compound 5	100
KIT(D816V)	Compound 5	93
KIT(L576P)	Compound 5	88
KIT(V559D)	Compound 5	100
KIT(V559D,T670I)	Compound 5	100
KIT(V559D,V654A)	Compound 5	100
LATS1	Compound 5	68
LATS2	Compound 5	94
LCK	Compound 5	100
LIMK1	Compound 5	85
LIMK2	Compound 5	84
LKB1	Compound 5	100
LOK	Compound 5	100
LTK	Compound 5	100
LYN	Compound 5	100
LZK	Compound 5	100
MAK	Compound 5	73
MAP3K1	Compound 5	78
MAP3K15	Compound 5	85
MAP3K2	Compound 5	100
MAP3K3	Compound 5	98
MAP3K4	Compound 5	84
MAP4K2	Compound 5	92
MAP4K3	Compound 5	74
MAP4K4	Compound 5	100
MAP4K5	Compound 5	89
MAPKAPK2	Compound 5	94
MAPKAPK5	Compound 5	81
MARK1	Compound 5	90
MARK2	Compound 5	100
MARK3	Compound 5	100
MARK4	Compound 5	100
MAST1	Compound 5	95
MEK1	Compound 5	99
MEK2	Compound 5	94
MEK3	Compound 5	100
MEK4	Compound 5	94
MEK6	Compound 5	100
MELK	Compound 5	83
MERTK	Compound 5	100
MET	Compound 5	2.2
MET(M1250T)	Compound 5	1.2
MET(Y1235D)	Compound 5	1.6
MINK	Compound 5	88
MKNK1	Compound 5	100
MKNK2	Compound 5	100
MLCK	Compound 5	92
MLK1	Compound 5	99
MLK2	Compound 5	99
MLK3	Compound 5	100
MRCKA	Compound 5	95
MRCKB	Compound 5	78
MST1	Compound 5	100
MST1R	Compound 5	80
MST2	Compound 5	100
MST3	Compound 5	85
MST4	Compound 5	100
MUSK	Compound 5	100
MYLK	Compound 5	92
MYLK2	Compound 5	100
MYO3A	Compound 5	100
MYO3B	Compound 5	79
NDR1	Compound 5	83
NDR2	Compound 5	100
NEK1	Compound 5	100
NEK2	Compound 5	79
NEK5	Compound 5	84
NEK6	Compound 5	93
NEK7	Compound 5	98
NEK9	Compound 5	98
NIM1	Compound 5	100
NLK	Compound 5	80
OSR1	Compound 5	100
p38-alpha	Compound 5	100
p38-beta	Compound 5	100
p38-delta	Compound 5	80
p38-gamma	Compound 5	100
PAK1	Compound 5	86
PAK2	Compound 5	100
PAK3	Compound 5	100
PAK4	Compound 5	100
PAK6	Compound 5	99
PAK7	Compound 5	100
PCTK1	Compound 5	95
PCTK2	Compound 5	100
PCTK3	Compound 5	100
PDGFRA	Compound 5	100
PDGFRB	Compound 5	87
PDPK1	Compound 5	100
PFTAIRE2	Compound 5	100
PFTK1	Compound 5	100
PHKG1	Compound 5	99
PHKG2	Compound 5	100
PIK3C2B	Compound 5	100
PIK3C2G	Compound 5	100
PIK3CA	Compound 5	100
PIK3CA(C420R)	Compound 5	100
PIK3CA(E542K)	Compound 5	100
PIK3CA(E545A)	Compound 5	100
PIK3CA(E545K)	Compound 5	100
PIK3CA(H1047L)	Compound 5	100
PIK3CA(H1047Y)	Compound 5	100
PIK3CA(M1043I)	Compound 5	100
PIK3CA(Q546K)	Compound 5	71
PIK3CB	Compound 5	89
PIK3CD	Compound 5	100
PIK3CG	Compound 5	88
PIK4CB	Compound 5	86
PIM1	Compound 5	99
PIM2	Compound 5	100
PIM3	Compound 5	100
PIP5K1A	Compound 5	100
PIP5K2B	Compound 5	59
PKAC-alpha	Compound 5	100
PKAC-beta	Compound 5	100
PKMYT1	Compound 5	59
PKN1	Compound 5	92
PKN2	Compound 5	100
PLK1	Compound 5	100
PLK2	Compound 5	100
PLK3	Compound 5	96
PLK4	Compound 5	100
PRKCD	Compound 5	92
PRKCE	Compound 5	100
PRKCH	Compound 5	100
PRKCQ	Compound 5	100
PRKD1	Compound 5	100
PRKD2	Compound 5	100
PRKD3	Compound 5	100
PRKG1	Compound 5	100
PRKG2	Compound 5	100
PRKR	Compound 5	96
PRKX	Compound 5	93
PRP4	Compound 5	100
PYK2	Compound 5	100
QSK	Compound 5	96
RAF1	Compound 5	86
RET	Compound 5	100
RET(M918T)	Compound 5	99
RET(V804L)	Compound 5	95
RET(V804M)	Compound 5	100
RIOK1	Compound 5	91
RIOK2	Compound 5	94
RIOK3	Compound 5	100
RIPK1	Compound 5	87
RIPK2	Compound 5	100
RIPK4	Compound 5	94
ROCK1	Compound 5	71
ROCK2	Compound 5	99
ROS1	Compound 5	100
RPS6KA1(Kin.Dom.1-N-terminal)	Compound 5	90
RPS6KA1(Kin.Dom.2-C-terminal)	Compound 5	78
RPS6KA2(Kin.Dom.1-N-terminal)	Compound 5	96
RPS6KA2(Kin.Dom.2-C-terminal)	Compound 5	82
RPS6KA3(Kin.Dom.1-N-terminal)	Compound 5	100
RPS6KA4(Kin.Dom.1-N-terminal)	Compound 5	96
RPS6KA4(Kin.Dom.2-C-terminal)	Compound 5	100
RPS6KA5(Kin.Dom.1-N-terminal)	Compound 5	100
RPS6KA5(Kin.Dom.2-C-terminal)	Compound 5	100
RPS6KA6(Kin.Dom.1-N-terminal)	Compound 5	93
RPS6KA6(Kin.Dom.2-C-terminal)	Compound 5	85
SBK1	Compound 5	81
SgK085	Compound 5	99
SgK110	Compound 5	75
SIK	Compound 5	86
SIK2	Compound 5	82
SLK	Compound 5	87
SNARK	Compound 5	100
SRC	Compound 5	100
SRMS	Compound 5	100
SRPK1	Compound 5	100
SRPK2	Compound 5	100
SRPK3	Compound 5	100
STK16	Compound 5	88
STK33	Compound 5	86
STK35	Compound 5	90
STK36	Compound 5	100
STK39	Compound 5	100
SYK	Compound 5	100
TAK1	Compound 5	85
TAO1	Compound 5	90
TAOK1	Compound 5	90
TAOK3	Compound 5	100
TBK1	Compound 5	100
TEC	Compound 5	95
TESK1	Compound 5	100
TGFBR1	Compound 5	99
TGFBR2	Compound 5	90
TIE1	Compound 5	100
TIE2	Compound 5	100
TLK1	Compound 5	78
TLK2	Compound 5	100
TNIK	Compound 5	100
TNK1	Compound 5	81
TNK2	Compound 5	78
TNNI3K	Compound 5	100
TRKA	Compound 5	100
TRKB	Compound 5	100
TRKC	Compound 5	100
TSSK1B	Compound 5	100
TTK	Compound 5	100
TXK	Compound 5	100
TYK2(JH1domain-catalytic)	Compound 5	88
TYK2(JH2domain-pseudokinase)	Compound 5	76
TYRO3	Compound 5	82
ULK1	Compound 5	79
ULK2	Compound 5	100
ULK3	Compound 5	100
VEGFR2	Compound 5	100
WEE1	Compound 5	100
WEE2	Compound 5	88
YANK2	Compound 5	98
YANK3	Compound 5	100
YES	Compound 5	87
YSK1	Compound 5	100
YSK4	Compound 5	100
ZAK	Compound 5	100
ZAP70	Compound 5	100
